# Supplementary material
Source: Royal Society of Chemistry journal article supplement (doi:10.1039/d5em00651a)
Supplement: d5em00651a1.pdf [file d5em00651a1.pdf]

Appendix A

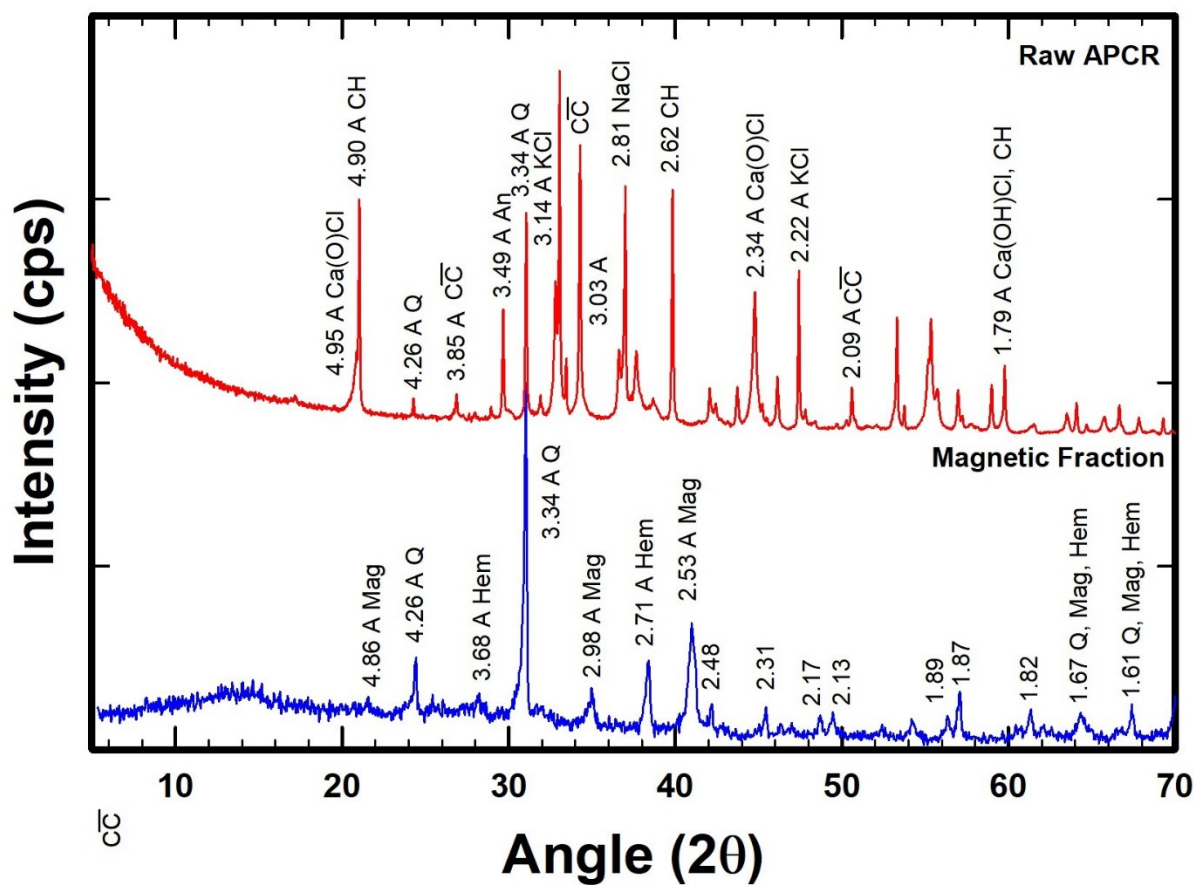

Figure A1 X-ray diffraction of raw APCR A3 and its magnetic fraction. Mag refers to magnetite, Hem represents hematite, Q refers to quartz, and the numbers correspond to d-values in Angstrom.

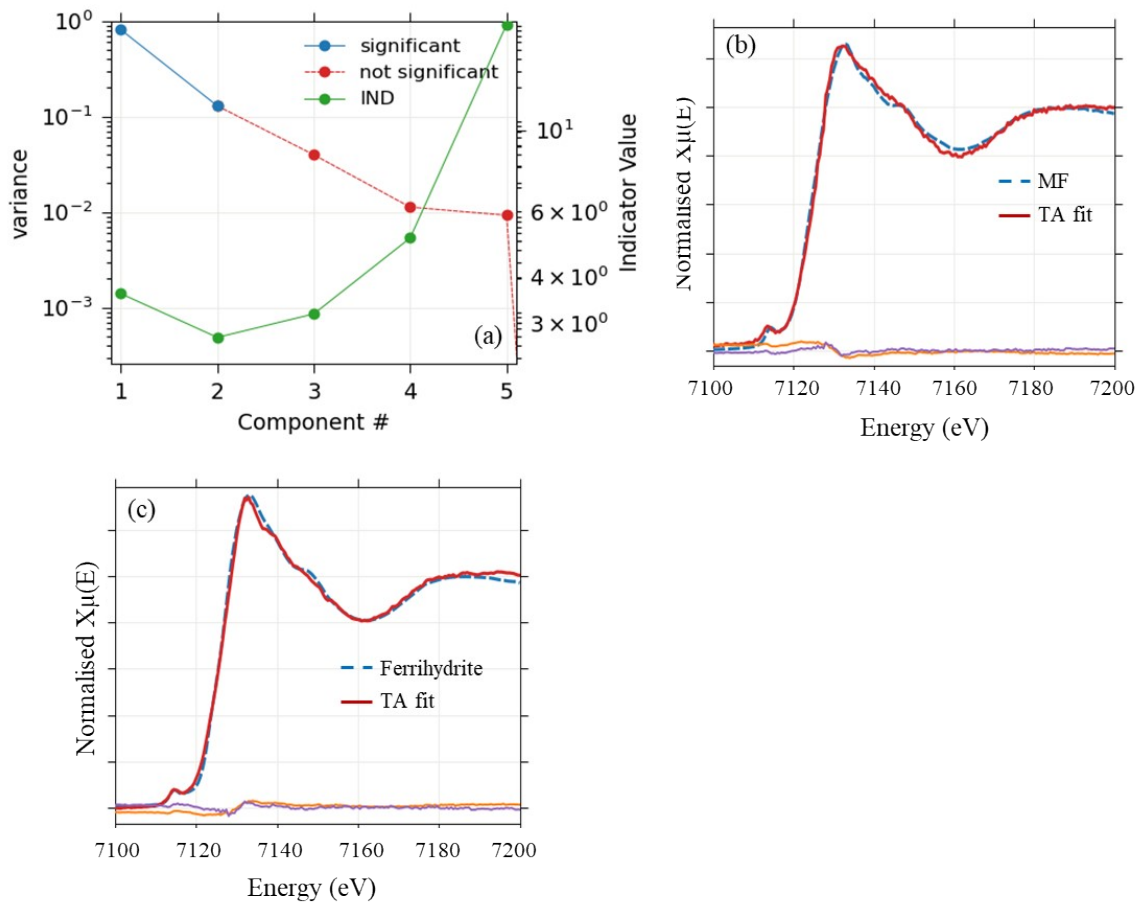

Figure A2 Factor indicator function (IND) values for all seven raw APCRs by Principal component analysis (PCA) (a); Target transform of magnetic fraction from APCR A3 spectrum (b) and ferrihydrate spectrum using the first two components generated from all seven raw APCRs (c).

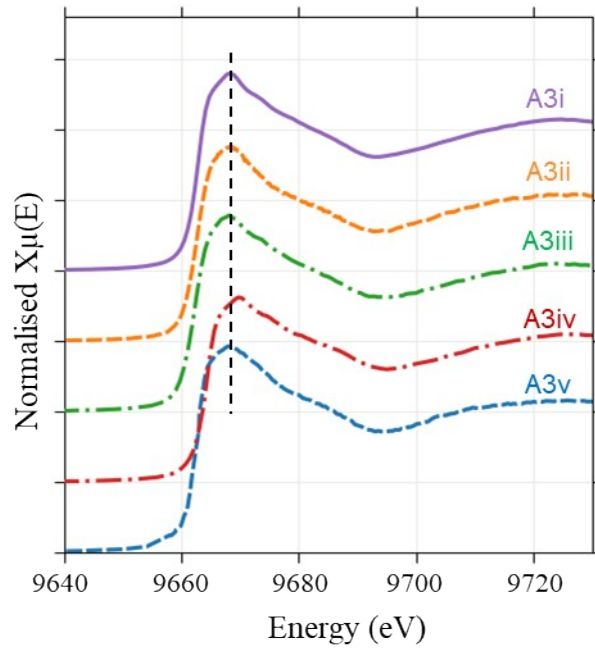

Figure A3 Zn K-edge X-ray XANES spectra for five A3 samples measured at various times.

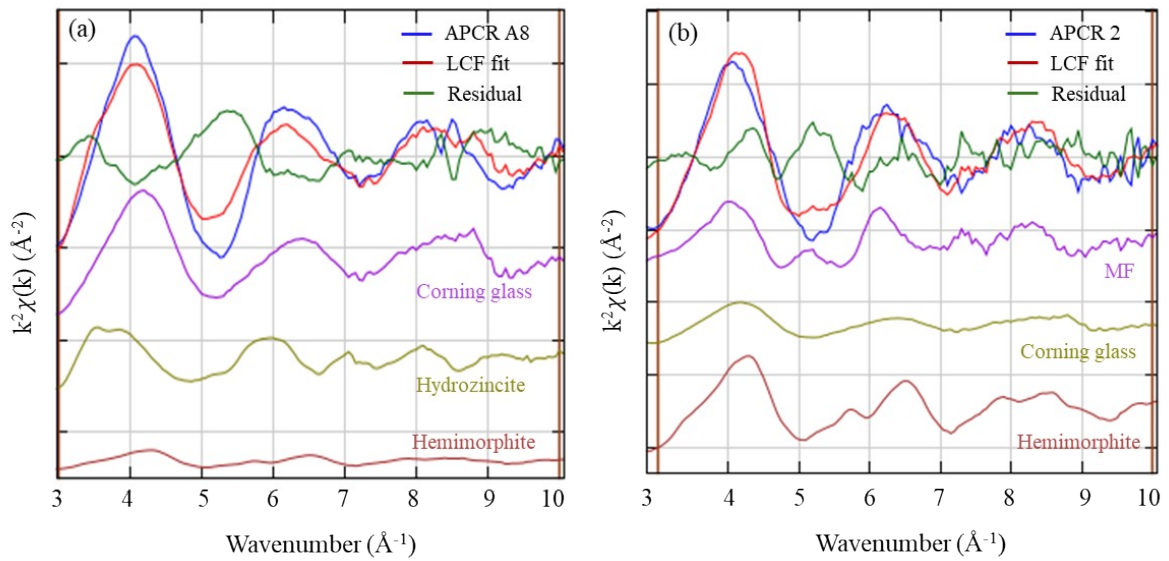

Figure A4 Linear combination fitting results of Zn K-edge EXAFS spectra for APCR A8 (a) and APCR 2 (b), with R-ranges from 3 to 10  $\text{\AA}^{-1}$  for both samples.

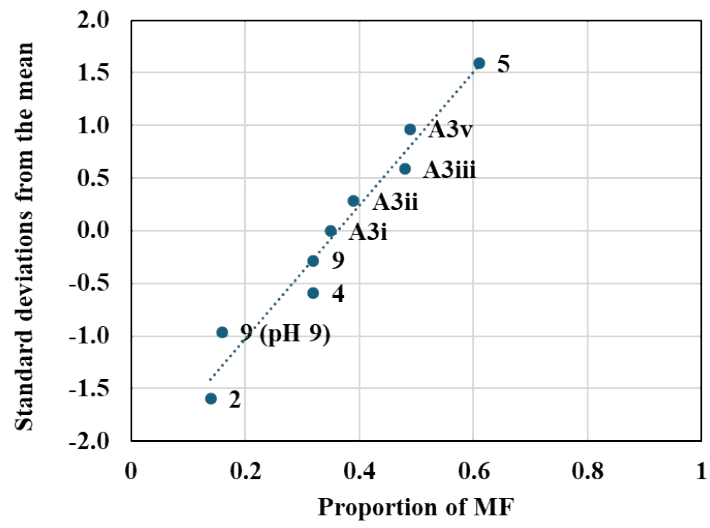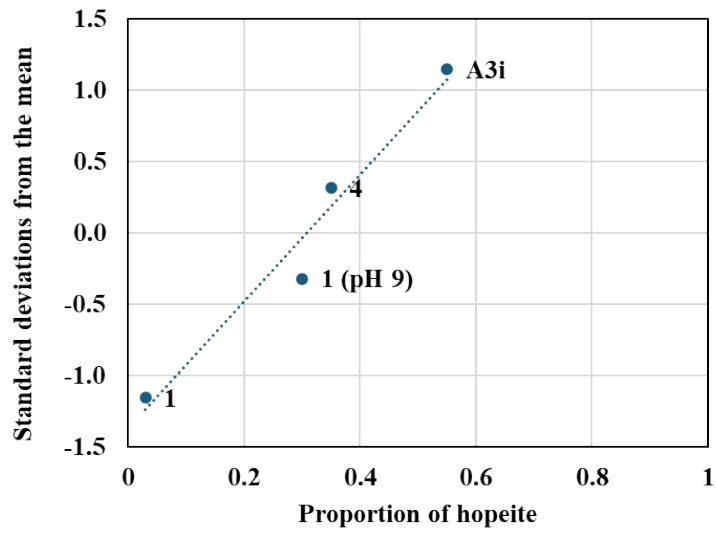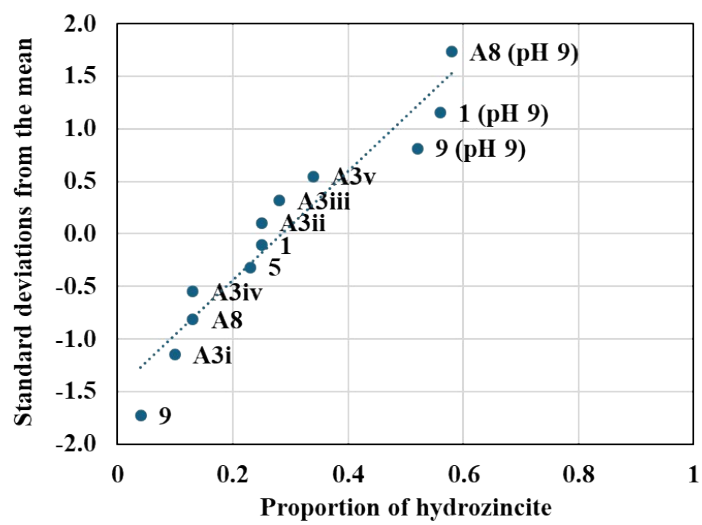

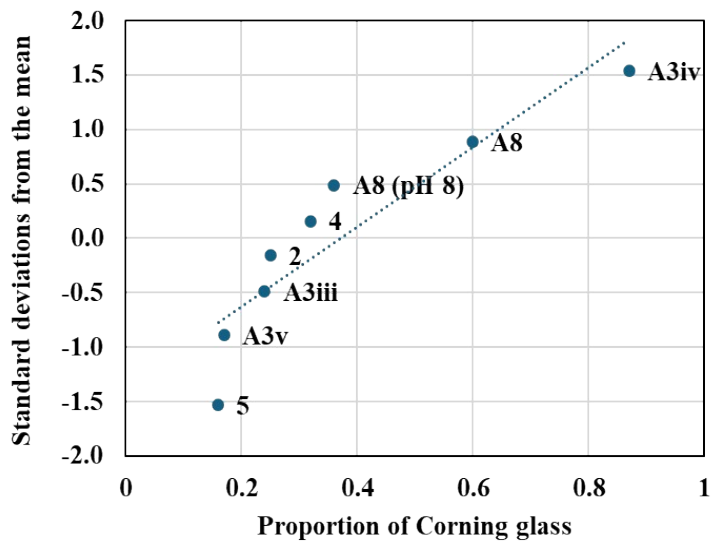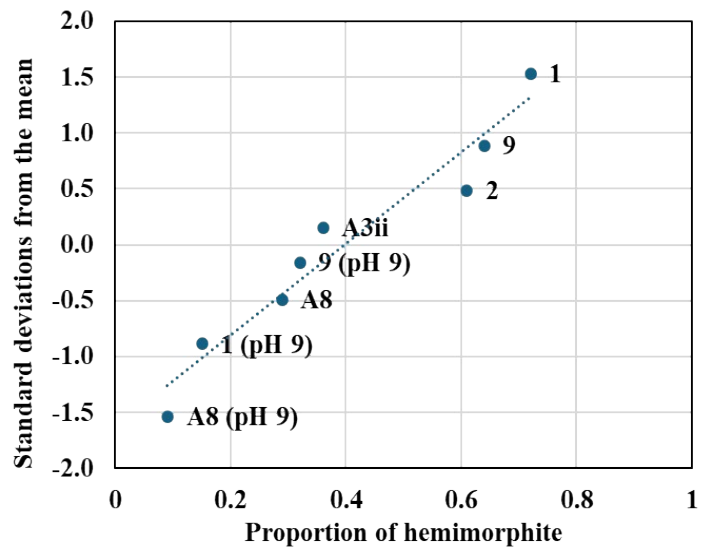

Figure A5 The cumulative normal distributions of proportions of APCR spinel (MF), hopeite, hydrozincite, Corning glass IR-X and hemimorphite in all raw APCR samples.

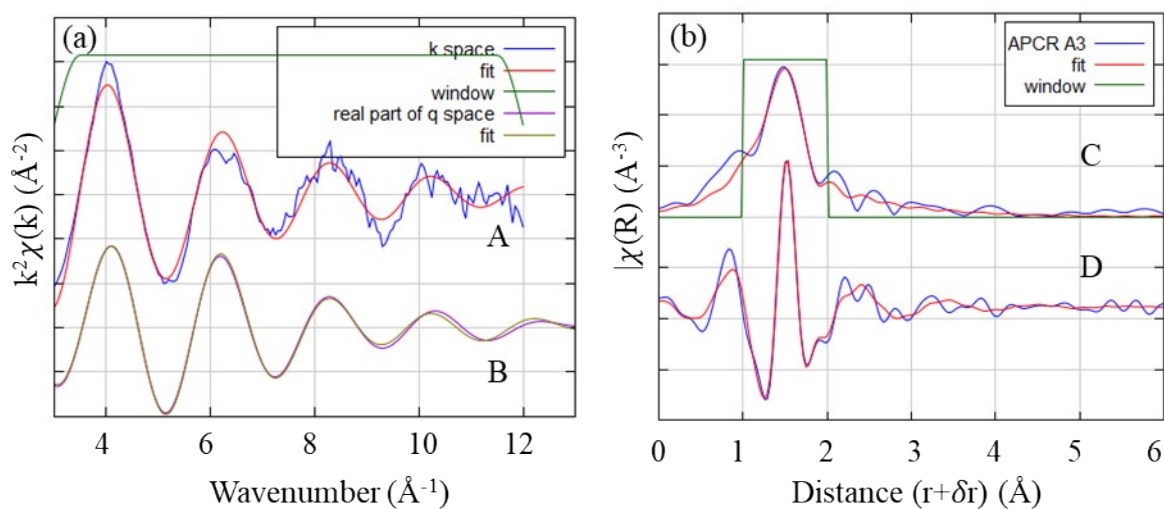

Figure A6 The  $\chi(k)$  spectra of APCR A3 as measured (A) and fitted and filtered from the corresponding Fourier Transform spectrum by back Fourier Transformation (B) (a), using reference material ZnO. Spectrum B has been filtered from the 1.0-2.0  $\text{\AA}$  region; Fourier Transform spectra of APCR A3 as measured and fitted in magnitude (C) and in real part (D) (b). Fourier Transform spectrum is uncorrected for phase shift. k-rang is 3.0-12.0  $\text{\AA}^{-1}$ .

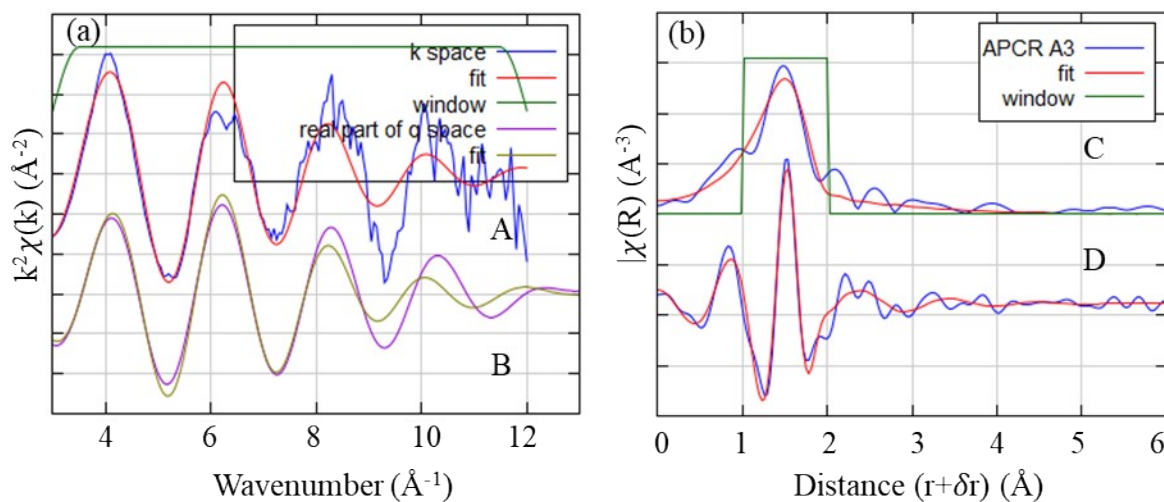

Figure A7 The  $\chi(k)$  spectra of APCR A3 as measured (A) and fitted and filtered from the corresponding Fourier Transform spectrum by back Fourier Transformation (B) (a), using reference material  $\text{ZnCl}_2$ . Spectrum B has been filtered from the 1.0-2.0  $\text{\AA}$  region; Fourier Transform spectra of APCR A3 as measured and fitted in magnitude (C) and in real part (D) (b). Fourier Transform spectrum is uncorrected for phase shift. k-rang is 3.0-12.0  $\text{\AA}^{-1}$ .

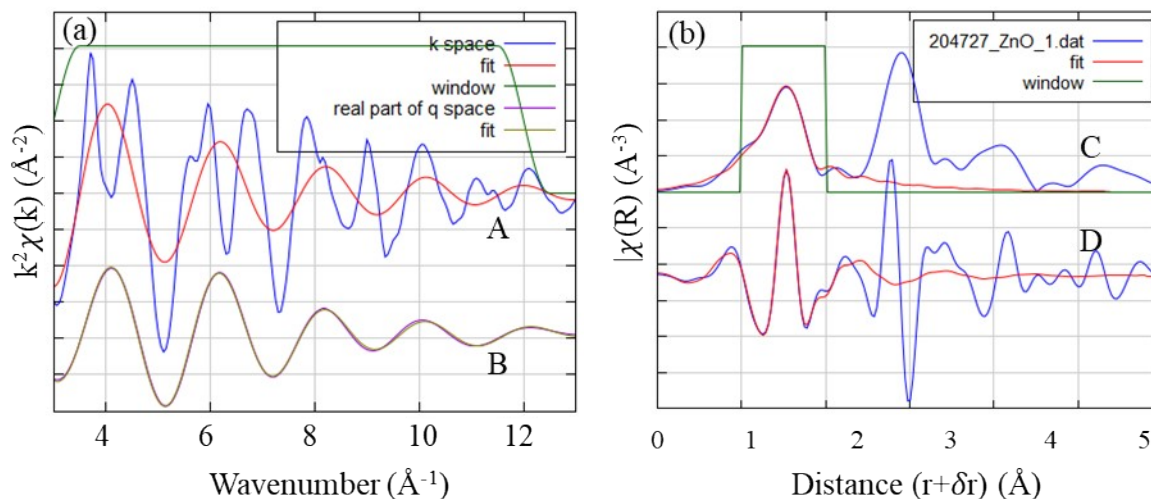

Figure A8 The  $\chi(k)$  spectra of ZnO as measured (A) and fitted and filtered from the corresponding Fourier Transform spectrum by back Fourier Transformation (B) (a). Spectrum B has been filtered from the 1.0-2.0 Å region; Fourier Transform spectra of ZnO as measured and fitted in magnitude (C) and in real part (D) (b). Fourier Transform spectrum is uncorrected for phase shift. k-range is 3.0-12.0 Å<sup>-1</sup>.

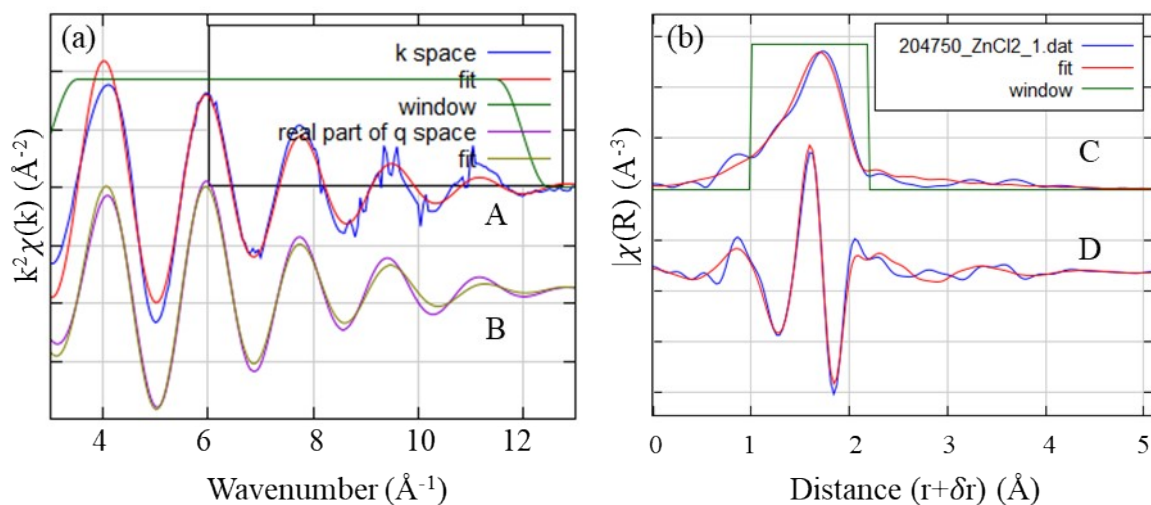

Figure A9 The  $\chi(k)$  spectra of ZnCl<sub>2</sub> as measured (A) and fitted and filtered from the corresponding Fourier Transform spectrum by back Fourier Transformation (B) (a). Spectrum B has been filtered from the 1.0-2.2 Å region; Fourier Transform spectra of ZnCl<sub>2</sub> as measured and fitted in magnitude (C) and in real part (D) (b). Fourier Transform spectrum is uncorrected for phase shift. k-range is 3.0-12.0 Å<sup>-1</sup>.

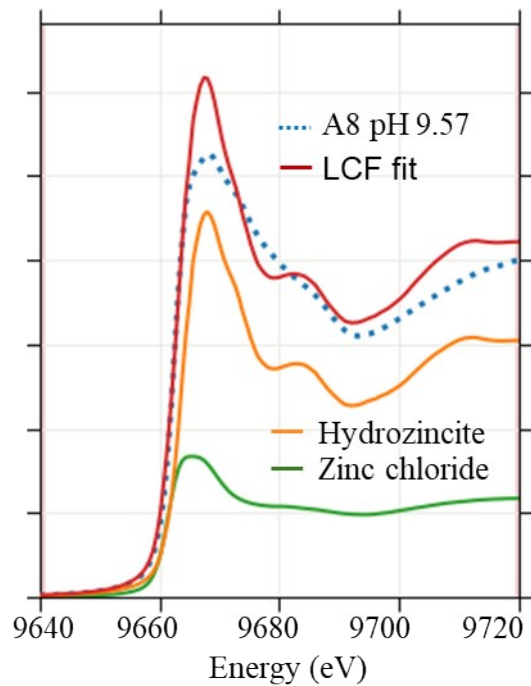

Figure A10. Best linear combination fit of Zn K-edge X-ray XANES spectrum for A8 pH 9.57, including zinc chloride as a reference compound, with a R-factor of 0.028.

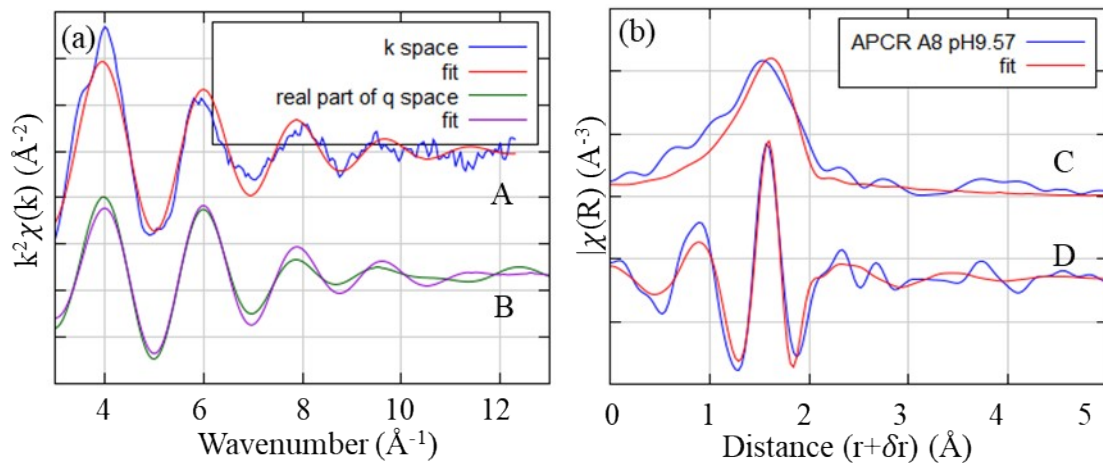

Figure A11 The  $\chi(k)$  spectra of APCR A8 pH9.57 as measured (A) and fitted and filtered from the corresponding Fourier Transform spectrum by back Fourier Transformation (B) (a), using reference material ZnO. Spectrum B has been filtered from the 1.0-2.0 Å region; Fourier Transform spectra of APCR A8 pH9 as measured and fitted in magnitude (C) and in real part (D) (b). Fourier Transform spectrum is uncorrected for phase shift. k-rang is 3.0-12.0 Å<sup>-1</sup>.

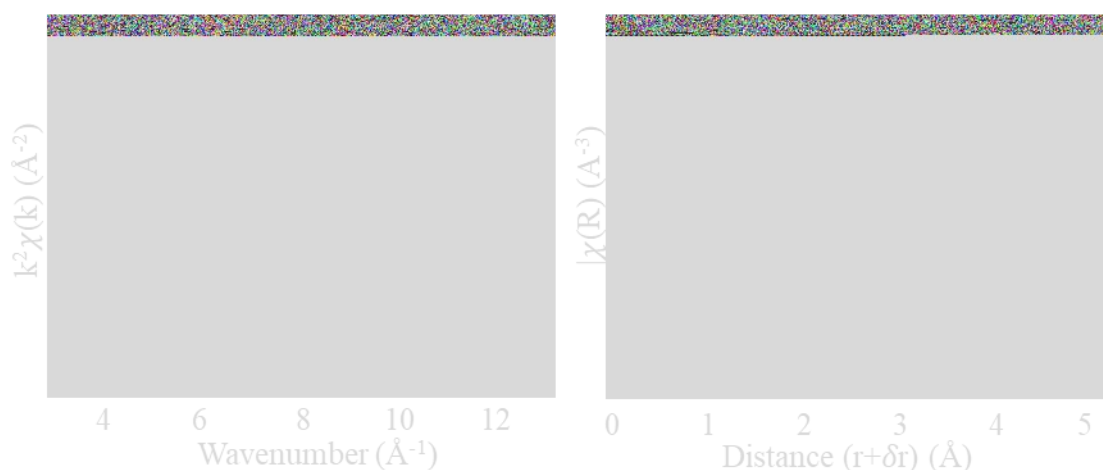

Figure A12 The  $\chi(k)$  spectra of APCR A8 pH9.57 as measured (A) and fitted and filtered from the corresponding Fourier Transform spectrum by back Fourier Transformation (B) (a), using reference material  $\text{ZnCl}_2$ . Spectrum B has been filtered from the 1.1-2.1 Å region; Fourier Transform spectra of APCR A8 pH9 as measured and fitted in magnitude (C) and in real part (D) (b). Fourier Transform spectrum is uncorrected for phase shift. k-rang is 3.0-12.0 Å<sup>-1</sup>.

Table A1 Structural parameters derived from curve fitting to theoretical standards for Zn standards ( $\text{ZnO}$  and  $\text{ZnCl}_2$ ) and APCR A3.

| Fitted standards and samples | Filter (Å)     | shell       | CN         | R (Å)        | $\Delta R$    | $\sigma^2(\text{Å})$ | $\Delta E_0(\text{eV})$ | R-factor     |
|------------------------------|----------------|-------------|------------|--------------|---------------|----------------------|-------------------------|--------------|
| ZnO                          | 1.0-2.0        | Zn-O        | 4.0*       | 1.964        | -0.014        | 0.005                | 2.295                   | 0.003        |
| $\text{ZnCl}_2$              | 1.0-2.2        | Zn-Cl       | 4.0*       | 2.198        | -0.074        | 0.010                | -7.142                  | 0.022        |
| <b>APCR A3</b>               | <b>1.0-2.0</b> | <b>Zn-O</b> | <b>4.1</b> | <b>1.943</b> | <b>-0.034</b> | <b>0.005</b>         | <b>0.206</b>            | <b>0.009</b> |
| APCR A3                      | 1.0-2.0        | Zn-Cl       | 5.8        | 2.065        | -0.207        | 0.014                | -20.030                 | 0.042        |
| <b>APCR A8 pH9.57</b>        | <b>1.0-2.0</b> | <b>Zn-O</b> | <b>5.1</b> | <b>2.013</b> | <b>0.048</b>  | <b>0.012</b>         | <b>2.359</b>            | <b>0.014</b> |
| APCR A8 pH9.57               | 1.0-2.0        | Zn-Cl       | 7.5        | 2.086        | -0.187        | 0.020                | -17.835                 | 0.120        |

Amplitude reduction factor  $SO^2$  is set as 0.93 by fitting ZnO standard <sup>1</sup>;

Fit range: 3-12 Å<sup>-1</sup> for ZnO,  $\text{ZnCl}_2$ , APCR A3 and APCR A8 pH9;

'\*' refers to a fixed parameter.

The best fit of APCR A3 or APCR A8 pH9.57 was highlighted in bold.

#### References:

1. D. T. Chen, UCL (University College London), 2024.
